# Supplementary material for: Earth System Model Aerosol–Cloud Diagnostics (ESMAC Diags) package, version 2: assessing aerosols, clouds, and aerosol–cloud interactions via field campaign and long-term observations
Source: Copernicus journal article supplement (doi:10.5194/gmd-16-6355-2023), 2023-11-08
Supplement: Supplementary file 1 [file gmd-16-6355-2023-supplement.pdf]

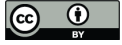

*Supplement of*

**Earth System Model Aerosol–Cloud Diagnostics (ESMAC Diags) package, version 2: assessing aerosols, clouds, and aerosol–cloud interactions via field campaign and long-term observations**

**Shuaiqi Tang et al.**

*Correspondence to:* Shuaiqi Tang ([shuaiqi.tang@pnnl.gov](mailto:shuaiqi.tang@pnnl.gov))

The copyright of individual parts of the supplement might differ from the article licence.

Table S1: data used for HI-SCALE

| Platform                      | Instrument                                                      | Measurements                                                                                    | Datastream name                                            | DOI or link                                                                                                                                                   |
|-------------------------------|-----------------------------------------------------------------|-------------------------------------------------------------------------------------------------|------------------------------------------------------------|---------------------------------------------------------------------------------------------------------------------------------------------------------------|
| Ground                        | Aerosol chemical speciation monitor (ACSM)                      | Aerosol composition                                                                             | sgpaosacsmC1.b1                                            | DOI: 10.5439/1762267                                                                                                                                          |
|                               | Scanning mobility particle sizer (SMPS)                         | Aerosol size distribution (20-700 nm)                                                           | sgpaossmpsS01.a1 (IOP1) and shilling-smps (IOP2)           | DOI: 10.5439/1476898                                                                                                                                          |
|                               | Nano scanning mobility particle sizer (nanoSMPS)                | Aerosol size distribution (2-150 nm)                                                            | sgpaosnanosmpsS01.a1                                       | DOI: 10.5439/1242975                                                                                                                                          |
|                               | Ultra-High Sensitivity Aerosol Spectrometer (UHSAS)             | Aerosol size distribution (60 – 1000 nm), number concentration                                  | sgpaosuhsasS01.a1                                          | DOI: 10.5439/1333828                                                                                                                                          |
|                               | Condensation particle counter (CPC)                             | Aerosol number concentration (> 10 nm)                                                          | sgpaoscpcC1.b1                                             | DOI: 10.5439/1025152                                                                                                                                          |
|                               | Condensation particle counter – ultrafine (CPCU)                | Aerosol number concentration (> 3 nm)                                                           | sgpaoscpcuS01.b1                                           | DOI: 10.5439/1046186                                                                                                                                          |
|                               | Cloud condensation nuclei (CCN) counter                         | CCN number concentration                                                                        | sgpaosccn1colavgC1.b1                                      | DOI: 10.5439/1342133                                                                                                                                          |
|                               | Multifilter rotating shadowband radiometer (MFRSR)              | Cloud optical depth and effective radius                                                        | sgpmfrsrclod1minC1.c1                                      | DOI: 10.5439/1027296                                                                                                                                          |
|                               | Cloud droplet number concentration retrieval (Ndrop)            | Cloud droplet number concentration                                                              | sgpndropmfrsrC1.c1                                         | DOI: 10.5439/1131339                                                                                                                                          |
|                               | Active remote sensing of clouds (ARSCL)                         | Cloud base height, cloud top height                                                             | sgparsclkazrbnd1kolliasC1.c0                               | DOI: 10.5439/1393438                                                                                                                                          |
|                               | Surface meteorological station (MET)                            | Temperature, relative humidity, wind, pressure, precipitation                                   | sgparmbeatmC1.c1                                           | DOI: 10.5439/1333748                                                                                                                                          |
|                               | Radiosonde                                                      | Temperature, relative humidity, wind                                                            |                                                            |                                                                                                                                                               |
|                               | Cloud radar, lidar, ceilometer                                  | Cloud fraction                                                                                  | sgparmbeclradC1.c1                                         | DOI: 10.5439/1333228                                                                                                                                          |
|                               | Total sky image (TSI)                                           | Cloud fraction                                                                                  |                                                            |                                                                                                                                                               |
| Surface radiation measurement | Longwave and shortwave radiation                                |                                                                                                 |                                                            |                                                                                                                                                               |
| Microwave radiometer (MWR)    | Liquid water path                                               |                                                                                                 |                                                            |                                                                                                                                                               |
| Satellite                     | Geostationary satellite-based retrievals using Visible Infrared | TOA shortwave and longwave radiation; cloud fraction; height, pressure and temperature at cloud | sgpvisstgridg13v4minnisX1.c1<br>sgpvisstpx2dg13minnisX1.c1 | <a href="https://adc.arm.gov/discovery/#/results/s::sgpvisstgridg13v4minnisX1.c1">https://adc.arm.gov/discovery/#/results/s::sgpvisstgridg13v4minnisX1.c1</a> |

|                                      |                                                                         |                                                                                     |                                                                                                                                                   |                                                                                                                                                         |
|--------------------------------------|-------------------------------------------------------------------------|-------------------------------------------------------------------------------------|---------------------------------------------------------------------------------------------------------------------------------------------------|---------------------------------------------------------------------------------------------------------------------------------------------------------|
|                                      | Solar-Infrared Split Window Technique (VISST) algorithm                 | top; liquid water path; cloud optical depth; droplet effective radius               |                                                                                                                                                   |                                                                                                                                                         |
| Aircraft                             | Ultra-High Sensitivity Aerosol Spectrometer (UHSAS)                     | Aerosol size distribution (60 – 1000 nm), number concentration                      | tomlinson-uhsas                                                                                                                                   | <a href="https://iop.archive.arm.gov/arm-iop/2016/sgp/hiscale/tomlinson-uhsas">https://iop.archive.arm.gov/arm-iop/2016/sgp/hiscale/tomlinson-uhsas</a> |
|                                      | Condensation particle counter (CPC)                                     | Aerosol number concentration (> 10 nm)                                              | mei-cpc                                                                                                                                           | <a href="https://iop.archive.arm.gov/arm-iop/2016/sgp/hiscale/mei-cpc">https://iop.archive.arm.gov/arm-iop/2016/sgp/hiscale/mei-cpc</a>                 |
|                                      | Condensation particle counter – ultrafine (CPCU)                        | Aerosol number concentration (> 3 nm)                                               | mei-cpc                                                                                                                                           | <a href="https://iop.archive.arm.gov/arm-iop/2016/sgp/hiscale/mei-cpc">https://iop.archive.arm.gov/arm-iop/2016/sgp/hiscale/mei-cpc</a>                 |
|                                      | Cloud condensation nuclei (CCN) counter                                 | CCN number concentration                                                            | mei-ccn                                                                                                                                           | <a href="https://iop.archive.arm.gov/arm-iop/2016/sgp/hiscale/mei-ccn">https://iop.archive.arm.gov/arm-iop/2016/sgp/hiscale/mei-ccn</a>                 |
|                                      | Interagency working group for airborne data and telemetry systems (IWG) | navigation information and basic atmospheric state parameters                       | mei-iwg1                                                                                                                                          | <a href="https://iop.archive.arm.gov/arm-iop/2016/sgp/hiscale/mei-iwg1">https://iop.archive.arm.gov/arm-iop/2016/sgp/hiscale/mei-iwg1</a>               |
|                                      | Fast integrated mobility spectrometer (FIMS)                            | Aerosol size distribution (10 – 425 nm)                                             | wang-fims                                                                                                                                         | <a href="https://iop.archive.arm.gov/arm-iop/2016/sgp/hiscale/wang-fims">https://iop.archive.arm.gov/arm-iop/2016/sgp/hiscale/wang-fims</a>             |
|                                      | Passive cavity aerosol spectrometer (PCASP)                             | Aerosol size distribution (120 – 3000 nm)                                           | tomlinson-pcasp                                                                                                                                   | <a href="https://iop.archive.arm.gov/arm-iop/2016/sgp/hiscale/tomlinson-pcasp">https://iop.archive.arm.gov/arm-iop/2016/sgp/hiscale/tomlinson-pcasp</a> |
|                                      | Best estimate aerosol size distribution (BEASD)                         | Aerosol size distribution combining FIMS, PCASP, CAS, and FCDP (~10nm - 10 $\mu$ m) | pekour-aafbe                                                                                                                                      | DOI: 10.5439/1838448                                                                                                                                    |
|                                      | Cloud probe merged size distribution (mergedSD)                         | Cloud size distribution combining FCDP, 2-DS and HVPS (1.5 $\mu$ m - 9075 $\mu$ m)  | mei-merged                                                                                                                                        | <a href="https://iop.archive.arm.gov/arm-iop/2016/sgp/hiscale/mei-merged">https://iop.archive.arm.gov/arm-iop/2016/sgp/hiscale/mei-merged</a>           |
|                                      | High-resolution time-of-flight aerosol mass spectrometer (AMS)          | Aerosol composition                                                                 | shilling-ams                                                                                                                                      | <a href="https://iop.archive.arm.gov/arm-iop/2016/sgp/hiscale/shilling-ams">https://iop.archive.arm.gov/arm-iop/2016/sgp/hiscale/shilling-ams</a>       |
| Water content measuring system (WCM) | Cloud liquid and total water content                                    | matthews-wcm                                                                        | <a href="https://iop.archive.arm.gov/arm-iop/2016/sgp/hiscale/matthews-wcm">https://iop.archive.arm.gov/arm-iop/2016/sgp/hiscale/matthews-wcm</a> |                                                                                                                                                         |

Table S2: data used for ACE-ENA

| Platform | Instrument                                                      | Measurements                                                   | Datastream name              | DOI or link                   |
|----------|-----------------------------------------------------------------|----------------------------------------------------------------|------------------------------|-------------------------------|
| Ground   | Ultra-High Sensitivity Aerosol Spectrometer (UHSAS)             | Aerosol size distribution (60 – 1000 nm), number concentration | enaaosuhsasC1.a1             | DOI: 10.5439/1409033          |
|          | Condensation particle counter (CPC)                             | Aerosol number concentration (> 10 nm)                         | enaaoscpfc1.b1               | DOI: 10.5439/1046184          |
|          | Cloud condensation nuclei (CCN) counter                         | CCN number concentration                                       | enaaosccn1colavgC1.b1        | DOI: 10.5439/1342133          |
|          | Aerosol chemical speciation monitor (ACSM)                      | Aerosol composition                                            | enaaosacsmC1.b2              | DOI: 10.5439/1762267          |
|          | Condensation particle counter (CPC)                             | Aerosol number concentration (> 10 nm)                         | mei-cpc                      | DOI: 10.5439/1440985          |
|          | Multifilter rotating shadowband radiometer (MFRSR)              | Cloud optical depth and effective radius                       | enamfrsrclod1minC1.c1        | DOI: 10.5439/1027296          |
|          | Cloud droplet number concentration retrieval (Ndrop)            | Cloud droplet number concentration                             | enandropmfrsrC1.c1           | DOI: 10.5439/1131339          |
|          | Cloud droplet number concentration retrieval by Wu et al (2020) | Cloud droplet number concentration, cloud effective radius     | Wu_etal                      | DOI: 10.1175/jcli-d-20-0272.1 |
|          | Active remote sensing of clouds (ARSL)                          | Cloud base height, cloud top height                            | enaarsclkazrbnd1kolliasC1.c0 | DOI: 10.5439/1393438          |
|          | Surface meteorological station (MET)                            | Temperature, relative humidity, wind, pressure, precipitation  | enaarmbeatmC1.c1             | DOI: 10.5439/1333748          |
|          | Radiosonde                                                      | Temperature, relative humidity, wind                           |                              |                               |
|          | Cloud radar, lidar, ceilometer                                  | Cloud fraction                                                 | enaarmbeclradC1.c1           | DOI: 10.5439/1333228          |
|          | Total sky image (TSI)                                           | Cloud fraction                                                 |                              |                               |
|          | Surface radiation measurement                                   | Longwave and shortwave radiation                               |                              |                               |
|          | Microwave radiometer (MWR)                                      | Liquid water path                                              |                              |                               |

|           |                                                                                                                         |                                                                                                                                                                       |                                                          |                                                                                                                                                                                                                                                                                                                        |
|-----------|-------------------------------------------------------------------------------------------------------------------------|-----------------------------------------------------------------------------------------------------------------------------------------------------------------------|----------------------------------------------------------|------------------------------------------------------------------------------------------------------------------------------------------------------------------------------------------------------------------------------------------------------------------------------------------------------------------------|
| Satellite | Geostationary satellite-based retrievals using Visible Infrared Solar-Infrared Split Window Technique (VISST) algorithm | TOA shortwave and longwave radiation; cloud fraction; height, pressure and temperature at cloud top; liquid water path; cloud optical depth; droplet effective radius | enavisstgridm10minnisX1.c1<br>enavisstpx2dm10minnisX1.c1 | <a href="https://adc.arm.gov/discovery/#/results/s::enavisstgridm10minnisX1.c1">https://adc.arm.gov/discovery/#/results/s::enavisstgridm10minnisX1.c1</a><br><a href="https://adc.arm.gov/discovery/#/results/s::enavisstpx2dm10minnisX1.c1">https://adc.arm.gov/discovery/#/results/s::enavisstpx2dm10minnisX1.c1</a> |
| Aircraft  | Condensation particle counter – ultrafine (CPCU)                                                                        | Aerosol number concentration (> 3 nm)                                                                                                                                 | mei-cpc                                                  | DOI: 10.5439/1440985                                                                                                                                                                                                                                                                                                   |
|           | Cloud condensation nuclei (CCN) counter                                                                                 | CCN number concentration                                                                                                                                              | enaaafccn2colaF1.b1,<br>enaaafccn2colbF1.b1              | DOI: 10.5439/1349242<br>DOI: 10.5439/1349243                                                                                                                                                                                                                                                                           |
|           | Interagency working group for airborne data and telemetry systems (IWG)                                                 | navigation information and basic atmospheric state parameters                                                                                                         | mei-iwg1                                                 | <a href="https://iop.archive.arm.gov/arm-iop/2017/ena/aceena/mei-iwg1">https://iop.archive.arm.gov/arm-iop/2017/ena/aceena/mei-iwg1</a>                                                                                                                                                                                |
|           | Fast integrated mobility spectrometer (FIMS)                                                                            | Aerosol size distribution (10 – 425 nm)                                                                                                                               | wang-fims                                                | <a href="https://iop.archive.arm.gov/arm-iop/2017/ena/aceena/wang-fims">https://iop.archive.arm.gov/arm-iop/2017/ena/aceena/wang-fims</a>                                                                                                                                                                              |
|           | Passive cavity aerosol spectrometer (PCASP)                                                                             | Aerosol size distribution (100 – 3000 nm)                                                                                                                             | tomlinson-pcas                                           | <a href="https://iop.archive.arm.gov/arm-iop/2017/ena/aceena/tomlinson-pcas">https://iop.archive.arm.gov/arm-iop/2017/ena/aceena/tomlinson-pcas</a>                                                                                                                                                                    |
|           | Optical particle counter (OPC)                                                                                          | Aerosol size distribution (390 – 15960 nm)                                                                                                                            | pekour-opc_iso                                           | <a href="https://iop.archive.arm.gov/arm-iop/2017/ena/aceena/pekour-opc_iso">https://iop.archive.arm.gov/arm-iop/2017/ena/aceena/pekour-opc_iso</a>                                                                                                                                                                    |
|           | Best estimate aerosol size distribution (BEASD)                                                                         | Aerosol size distribution combining FIMS, PCASP, CAS, and FCDP (~10nm - 10µm)                                                                                         | pekour-asdbe                                             | DOI: 10.5439/1867870                                                                                                                                                                                                                                                                                                   |
|           | Cloud probe merged size distribution (mergedSD)                                                                         | Cloud size distribution combining FCDP, 2-DS and HVPS (1.5µm - 9075µm)                                                                                                | mei-2dsfcdphvps                                          | <a href="https://iop.archive.arm.gov/arm-iop/2017/ena/aceena/mei-2dsfcdphvps">https://iop.archive.arm.gov/arm-iop/2017/ena/aceena/mei-2dsfcdphvps</a>                                                                                                                                                                  |
|           | High-resolution time-of-flight aerosol mass spectrometer (AMS)                                                          | Aerosol composition                                                                                                                                                   | shilling-hrfams                                          | Doi: 10.5439/1468474                                                                                                                                                                                                                                                                                                   |
|           | Water content measuring system (WCM)                                                                                    | Cloud liquid and total water content                                                                                                                                  | matthews-wcm                                             | Doi: 10.5439/1465759                                                                                                                                                                                                                                                                                                   |

Table S3: Instruments for MAGIC

| Platform  | Instrument                                                                                                              | Measurements                                                                                                                                                          | Datastream name          | DOI or link                                                                                                                                           |
|-----------|-------------------------------------------------------------------------------------------------------------------------|-----------------------------------------------------------------------------------------------------------------------------------------------------------------------|--------------------------|-------------------------------------------------------------------------------------------------------------------------------------------------------|
| Ship      | Meteorological station (MET)                                                                                            | Temperature, relative humidity, wind, pressure                                                                                                                        | raynolds-marmet          | <a href="https://iop.archive.arm.gov/arm-iop/2012/mag/magic/reynolds-marmet/">https://iop.archive.arm.gov/arm-iop/2012/mag/magic/reynolds-marmet/</a> |
|           | Microwave radiometer (MWR)                                                                                              | Liquid water path, precipitable water vapor                                                                                                                           | magmwrret1liljclouM1.s2  | DOI: 10.5439/1027369                                                                                                                                  |
|           | Ultra-High Sensitivity Aerosol Spectrometer (UHSAS)                                                                     | Aerosol size distribution (60 – 1000 nm), number concentration                                                                                                        | magaosuhsasM1.a1         | DOI: 10.5439/1333828                                                                                                                                  |
|           | Condensation particle counter (CPC)                                                                                     | Aerosol number concentration (> 10 nm)                                                                                                                                | magaospcfM1.a1           | DOI: 10.5439/1046184                                                                                                                                  |
|           | Cloud condensation nuclei (CCN) counter                                                                                 | CCN number concentration                                                                                                                                              | magaosccn100M1.a1        | DOI: 10.5439/1227964                                                                                                                                  |
|           | Cloud droplet number concentration retrieval by Wu et al (2020)                                                         | Cloud droplet number concentration, cloud effective radius                                                                                                            | Wu_etal                  | DOI: 10.1175/jcli-d-20-0272.1                                                                                                                         |
| Satellite | Geostationary satellite-based retrievals using Visible Infrared Solar-Infrared Split Window Technique (VISST) algorithm | TOA shortwave and longwave radiation; cloud fraction; height, pressure and temperature at cloud top; liquid water path; cloud optical depth; droplet effective radius | magvisstpxg15minnisX1.c1 | <a href="https://adc.arm.gov/discovery/#/results/s::magic%20visst">https://adc.arm.gov/discovery/#/results/s::magic%20visst</a>                       |

Table S4: Instruments for MARCUS

| Platform  | Instrument                                                                                                              | Measurements                                                                                                                                                          | Datastream name                                                              | DOI or link                                                                                                                                             |
|-----------|-------------------------------------------------------------------------------------------------------------------------|-----------------------------------------------------------------------------------------------------------------------------------------------------------------------|------------------------------------------------------------------------------|---------------------------------------------------------------------------------------------------------------------------------------------------------|
| Ship      | Meteorological station (MET)                                                                                            | Temperature, relative humidity, wind, pressure                                                                                                                        | maraadmetX1.b1                                                               | DOI: 10.5439/1593144                                                                                                                                    |
|           | Microwave radiometer (MWR)                                                                                              | Liquid water path, precipitable water vapor                                                                                                                           | marmwrret1liljclouM1.s2                                                      | DOI: 10.5439/1027369                                                                                                                                    |
|           | Ultra-High Sensitivity Aerosol Spectrometer (UHSAS)                                                                     | Aerosol size distribution (60 – 1000 nm), number concentration                                                                                                        | maraosuhsasM1.a1                                                             | DOI: 10.5439/1333828                                                                                                                                    |
|           | Condensation particle counter (CPC)                                                                                     | Aerosol number concentration (> 10 nm)                                                                                                                                | maraospcf1mM1.b1                                                             | DOI: 10.5439/1418260                                                                                                                                    |
|           | Cloud condensation nuclei (CCN) counter                                                                                 | CCN number concentration                                                                                                                                              | maraosccn1colavgM1.b1                                                        | DOI: 10.5439/1342133                                                                                                                                    |
|           | Reprocessed CN and CCN                                                                                                  | CN and CCN number concentration                                                                                                                                       | MARCUS ARM CN and CCN data reprocessed to remove ship exhaust influence. v1. | DOI: 10.25919/ezp0-em87                                                                                                                                 |
| Satellite | Geostationary satellite-based retrievals using Visible Infrared Solar-Infrared Split Window Technique (VISST) algorithm | TOA shortwave and longwave radiation; cloud fraction; height, pressure and temperature at cloud top; liquid water path; cloud optical depth; droplet effective radius | marvisstgridh08minnisX1.c1                                                   | <a href="https://adc.arm.gov/discovery/#/results/s::marvistgridh08minnisX1.c1">https://adc.arm.gov/discovery/#/results/s::marvistgridh08minnisX1.c1</a> |

Table S5: Instruments for CSET

| Platform | Instrument                                          | Measurements                                                        | Datastream name                                                                                     | DOI or link           |
|----------|-----------------------------------------------------|---------------------------------------------------------------------|-----------------------------------------------------------------------------------------------------|-----------------------|
| aircraft | Ultra-High Sensitivity Aerosol Spectrometer (UHSAS) | Aerosol size distribution (60 – 1000 nm), number concentration      | Low Rate (LRT - 1 sps) Navigation, State Parameter, and Microphysics Flight-Level Data. Version 1.3 | DOI: 10.5065/D65Q4T96 |
|          | Condensation nuclei counter (CNC)                   | Aerosol number concentration (11-3000 nm)                           | Same as above                                                                                       | DOI: 10.5065/D65Q4T96 |
|          | Passive cavity aerosol spectrometer (PCASP)         | Aerosol size distribution (120 – 3000 nm)                           | Same as above                                                                                       | DOI: 10.5065/D65Q4T96 |
|          | PMS-King Liquid Water Content (LWC)                 | Liquid water content                                                | Same as above                                                                                       | DOI: 10.5065/D65Q4T96 |
|          | 1DC                                                 | Cloud droplet number size distribution (12.5 – 1590 $\mu\text{m}$ ) | Same as above                                                                                       | DOI: 10.5065/D65Q4T96 |
|          | 2DC                                                 | Cloud droplet number size distribution (12.5 – 1590 $\mu\text{m}$ ) | Same as above                                                                                       | DOI: 10.5065/D65Q4T96 |
|          | CDP                                                 | Cloud droplet number size distribution (2 – 50 $\mu\text{m}$ )      | Same as above                                                                                       | DOI: 10.5065/D65Q4T96 |



Table S6: Instruments for SOCRATES

| Platform | Instrument                                          | Measurements                                                        | Datastream name                                                                                     | DOI or link           |
|----------|-----------------------------------------------------|---------------------------------------------------------------------|-----------------------------------------------------------------------------------------------------|-----------------------|
| aircraft | Cloud condensation nuclei (CCN) counter             | CCN number concentration                                            | SOCRATES CCN measurements. Version 1.1                                                              | DOI: 10.5065/D6Z036XB |
|          | Ultra-High Sensitivity Aerosol Spectrometer (UHSAS) | Aerosol size distribution (60 – 1000 nm), number concentration      | Low Rate (LRT - 1 sps) Navigation, State Parameter, and Microphysics Flight-Level Data. Version 1.3 | DOI: 10.5065/D6M32TM9 |
|          | Condensation nuclei counter (CNC)                   | Aerosol number concentration (11-3000 nm)                           | Same as above                                                                                       | DOI: 10.5065/D6M32TM9 |
|          | PMS-King Liquid Water Content (LWC)                 | Liquid water content                                                | Same as above                                                                                       | DOI: 10.5065/D6M32TM9 |
|          | 1DC                                                 | Cloud droplet number size distribution (12.5 – 1590 $\mu\text{m}$ ) | Same as above                                                                                       | DOI: 10.5065/D6M32TM9 |
|          | 2DC                                                 | Cloud droplet number size distribution (12.5 – 1590 $\mu\text{m}$ ) | Same as above                                                                                       | DOI: 10.5065/D6M32TM9 |
|          | 2DS                                                 | Cloud droplet number size distribution (5 – 2565 $\mu\text{m}$ )    | Same as above                                                                                       | DOI: 10.5065/D6M32TM9 |
|          | CDP                                                 | Cloud droplet number size distribution (2 – 50 $\mu\text{m}$ )      | Same as above                                                                                       | DOI: 10.5065/D6M32TM9 |

Table S7: long-term measurements at SGP

| <b>Datastream name</b>                                        | <b>Instrument</b>                                                                                                                 | <b>Measurements</b>                                                                                                | <b>Data period</b>                         | <b>DOI or link</b>                                                                                                                                              |
|---------------------------------------------------------------|-----------------------------------------------------------------------------------------------------------------------------------|--------------------------------------------------------------------------------------------------------------------|--------------------------------------------|-----------------------------------------------------------------------------------------------------------------------------------------------------------------|
| sgpmetE13.b1                                                  | Surface meteorological station (MET)                                                                                              | Temperature, relative humidity, wind, pressure                                                                     | 20110101 – 20201231                        | DOI: 10.5439/1786358                                                                                                                                            |
| sgpaoscpC1.b1<br>sgpaoscpfE13.b1                              | Condensation particle counter (CPC)                                                                                               | Aerosol number concentration (> 10 nm)                                                                             | 20110310 – 20160711<br>20161114 – 20200402 | DOI: 10.5439/1025152<br>DOI: 10.5439/1046184                                                                                                                    |
| sgpaossmpsE13.b1                                              | Scanning mobility particle sizer (SMPS)                                                                                           | Aerosol size distribution (20-700 nm)                                                                              | 20161115 – 20201231                        | DOI: 10.5439/1476898                                                                                                                                            |
| sgpaosnanosmpsE13.b1                                          | Nano scanning mobility particle sizer (nanoSMPS)                                                                                  | Aerosol size distribution (2-150 nm)                                                                               | 20161115 – 20201231                        | DOI: 10.5439/1635016                                                                                                                                            |
| sgpaosuhsasE13.b1                                             | Ultra-High Sensitivity Aerosol Spectrometer (UHSAS)                                                                               | Aerosol size distribution (60 – 1000 nm), number concentration                                                     | 20190109 – 20200731                        | DOI: 10.5439/1409033                                                                                                                                            |
| sgptdmasizeC1.b1                                              | Tandem Differential Mobility Analyzer (TDMA)                                                                                      | Aerosol size distribution (12 nm - 15 µm)                                                                          | 20110101 – 20141120                        | DOI: 10.5439/1025303                                                                                                                                            |
| sgpaosccn1colspectraC1.b1<br>sgpaosccn2colaspectraE13.b1      | Cloud condensation nuclei (CCN) counter                                                                                           | CCN number concentration, spectral data                                                                            | 20110810 – 20170816<br>20170412 – 20201231 | DOI: 10.5439/1342134<br>DOI: 10.5439/1323896                                                                                                                    |
| sgpaosacsmC1.b2<br>sgpaosacsmE13.b2                           | Aerosol chemical speciation monitor (ACSM)                                                                                        | Aerosol composition                                                                                                | 20110101 – 20161003<br>20161129 – 20201231 | DOI: 10.5439/1762267<br>DOI: 10.5439/1762267                                                                                                                    |
| sgpmfrsrclod1minC1.c1                                         | Cloud optical properties from the multifilter rotating shadowband radiometer (MFRSR)                                              | Cloud optical depth, droplet effective radius, liquid water path, cloud fraction                                   | 20110101 – 20201231                        | DOI: 10.5439/1395157                                                                                                                                            |
| sgparsclkazrbnd1kolliasC1.c1<br>sgparsclkazrbnd1kolliasC1.c0  | Active remote sensing of clouds (ARSL) product using Ka-band ARM zenith radars                                                    | Cloud base height, cloud top height                                                                                | 20110118 – 20140315<br>20140316 – 20201231 | DOI: 10.5439/1228769<br>DOI: 10.5439/1393438                                                                                                                    |
| sgpinterpolatedsondeC1.c1                                     | Interpolated radiosonde data                                                                                                      | Temperature, relative humidity, wind                                                                               | 20110101 – 20201231                        | DOI: 10.5439/1095316                                                                                                                                            |
| sgparmbeatmC1.c1<br>sgparmbeclradC1.c1                        | ARM best estimate (ARMBE) data for atmospheric variables (armbeatm) or cloud and radiation variables (armbeclrad)                 | Temperature, relative humidity, wind, pressure, precipitation; cloud fraction, liquid water path, radiative fluxes | 20110101 – 20201231<br>20110101 – 20201231 | DOI: 10.5439/1333748<br>DOI: 10.5439/1333228                                                                                                                    |
| sgpvisstgridg13v4minnisX1.c1*<br>sgpvisstgridg16v4minnisX1.c1 | Visible Infrared Solar-Infrared Split-Window Technique (VISST)-derived 0.5°×0.5° gridded products from GOES13 or GOES16 satellite | cloud and radiative properties                                                                                     | 20110101 – 20171231<br>20180101 – 20201231 | <a href="https://adc.arm.gov/disc/overly/#/results/s::sgpvistgridg13v4minnisX1.c1">https://adc.arm.gov/disc/overly/#/results/s::sgpvistgridg13v4minnisX1.c1</a> |
| sgpvisstpx2dg13minnisX1.c1<br>sgpvisstpx2dg16minnisX1.c1      | VISST-derived 2D pixel-level (4km) products from GOES13 or GOES16 satellite                                                       | cloud and radiative properties                                                                                     | 20110101 – 20171231<br>20180101 – 20201231 | <a href="https://adc.arm.gov/disc/overly/#/results/s::sgpvistpx2dg13minnisX1.c1">https://adc.arm.gov/disc/overly/#/results/s::sgpvistpx2dg13minnisX1.c1</a>     |

\*there are missing periods 20120923 – 20121015 and 20130522 – 20130530 which are filled by sgpvisstgridg15v4minnisX1.c1

Table S8: long-term measurements at ENA

| <b>Datastream name</b>                                   | <b>Instrument</b>                                                                                                 | <b>Measurements</b>                                                                                                | <b>Data period</b>                         | <b>DOI or link</b>                                                                                                                                        |
|----------------------------------------------------------|-------------------------------------------------------------------------------------------------------------------|--------------------------------------------------------------------------------------------------------------------|--------------------------------------------|-----------------------------------------------------------------------------------------------------------------------------------------------------------|
| enametC1.b1                                              | Surface meteorological station (MET)                                                                              | Temperature, relative humidity, wind, pressure                                                                     | 20160101 – 20181231                        | DOI: 10.5439/1786358                                                                                                                                      |
| enaaoscpfc1.b1                                           | Fine condensation particle counter (CPCF)                                                                         | Aerosol number concentration (> 10 nm)                                                                             | 20160101 – 20181231                        | DOI: 10.5439/1046184                                                                                                                                      |
| enaaosuhsasC1.b1                                         | Ultra-High Sensitivity Aerosol Spectrometer (UHSAS)                                                               | Aerosol size distribution (60 - 1000 nm), number concentration                                                     | 20160101 – 20181231                        | DOI: 10.5439/1409033                                                                                                                                      |
| enaaosacsmC1.b2                                          | Aerosol chemical speciation monitor (ACSM)                                                                        | Aerosol composition                                                                                                | 20160219 – 20181231                        | DOI: 10.5439/1762267                                                                                                                                      |
| enaaosccn1colspectraC1.b1                                | Cloud condensation nuclei (CCN) counter                                                                           | CCN number concentration, spectral data                                                                            | 20160623 – 20181231                        | DOI: 10.5439/1342134                                                                                                                                      |
| enamfrsrclod1minC1.c1                                    | Cloud optical properties from the multifilter rotating shadowband radiometer (MFRSR)                              | Cloud optical depth, droplet effective radius, liquid water path, cloud fraction                                   | 20160101 – 20181231                        | DOI: 10.5439/1027296                                                                                                                                      |
| enaarsclkazrbnl1kolliasC1.c0                             | Active remote sensing of clouds (ARSCL) product using Ka-band ARM zenith radars                                   | Cloud base height, cloud top height                                                                                | 20160101 – 20181231                        | DOI: 10.5439/1393438                                                                                                                                      |
| enainterpolatedsondeC1.c1                                | Interpolated radiosonde data                                                                                      | Temperature, relative humidity, wind                                                                               | 20160101 – 20181231                        | DOI: 10.5439/1095316                                                                                                                                      |
| enaarmbeatmC1.c1<br>enaarmbeclradC1.c1                   | ARM best estimate (ARMBE) data for atmospheric variables (armbeatm) or cloud and radiation variables (armbeclrad) | Temperature, relative humidity, wind, pressure, precipitation; cloud fraction, liquid water path, radiative fluxes | 20160101 – 20181231                        | DOI: 10.5439/1333748<br>DOI: 10.5439/1333228                                                                                                              |
| enavisstgridm10minnisX1.c1<br>enavisstgridm11minnisX1.c1 | VISST-derived 0.5°×0.5° gridded products from Meteosat-10 or Meteosat-11 satellite                                | cloud and radiative properties                                                                                     | 20160101 – 20180220<br>20180220 – 20181231 | <a href="https://adc.arm.gov/disc/over/#/results/s::enavisstgridm10minnisX1.c1">https://adc.arm.gov/disc/over/#/results/s::enavisstgridm10minnisX1.c1</a> |
| enavisstpx2dm10minnisX1.c1<br>enavisstpx2dm11minnisX1.c1 | VISST-derived 2D pixel-level (4km) products from Meteosat-10 or Meteosat-11 satellite                             | cloud and radiative properties                                                                                     | 20160101 – 20180220<br>20180220 – 20181231 | <a href="https://adc.arm.gov/disc/over/#/results/s::enavisstpx2dm10minnisX1.c1">https://adc.arm.gov/disc/over/#/results/s::enavisstpx2dm10minnisX1.c1</a> |
| Wu_etal Retrieval                                        | Stratus cloud retrieval from ground-based measurements using retrieval algorithm from Wu et al. (2020)            | Cloud droplet number concentration, effective radius                                                               | 20160101 – 20181231                        | DOI: 10.1029/2019JD032205                                                                                                                                 |
| Aerosol Mask                                             | Masking 1-min CPC data dominated by local aerosol sources using algorithm from Gallo et al. (2020)                | Aerosol number concentration and mask flag                                                                         | 20160101 – 20181231                        | DOI: 10.5194/acp-20-7553-2020                                                                                                                             |

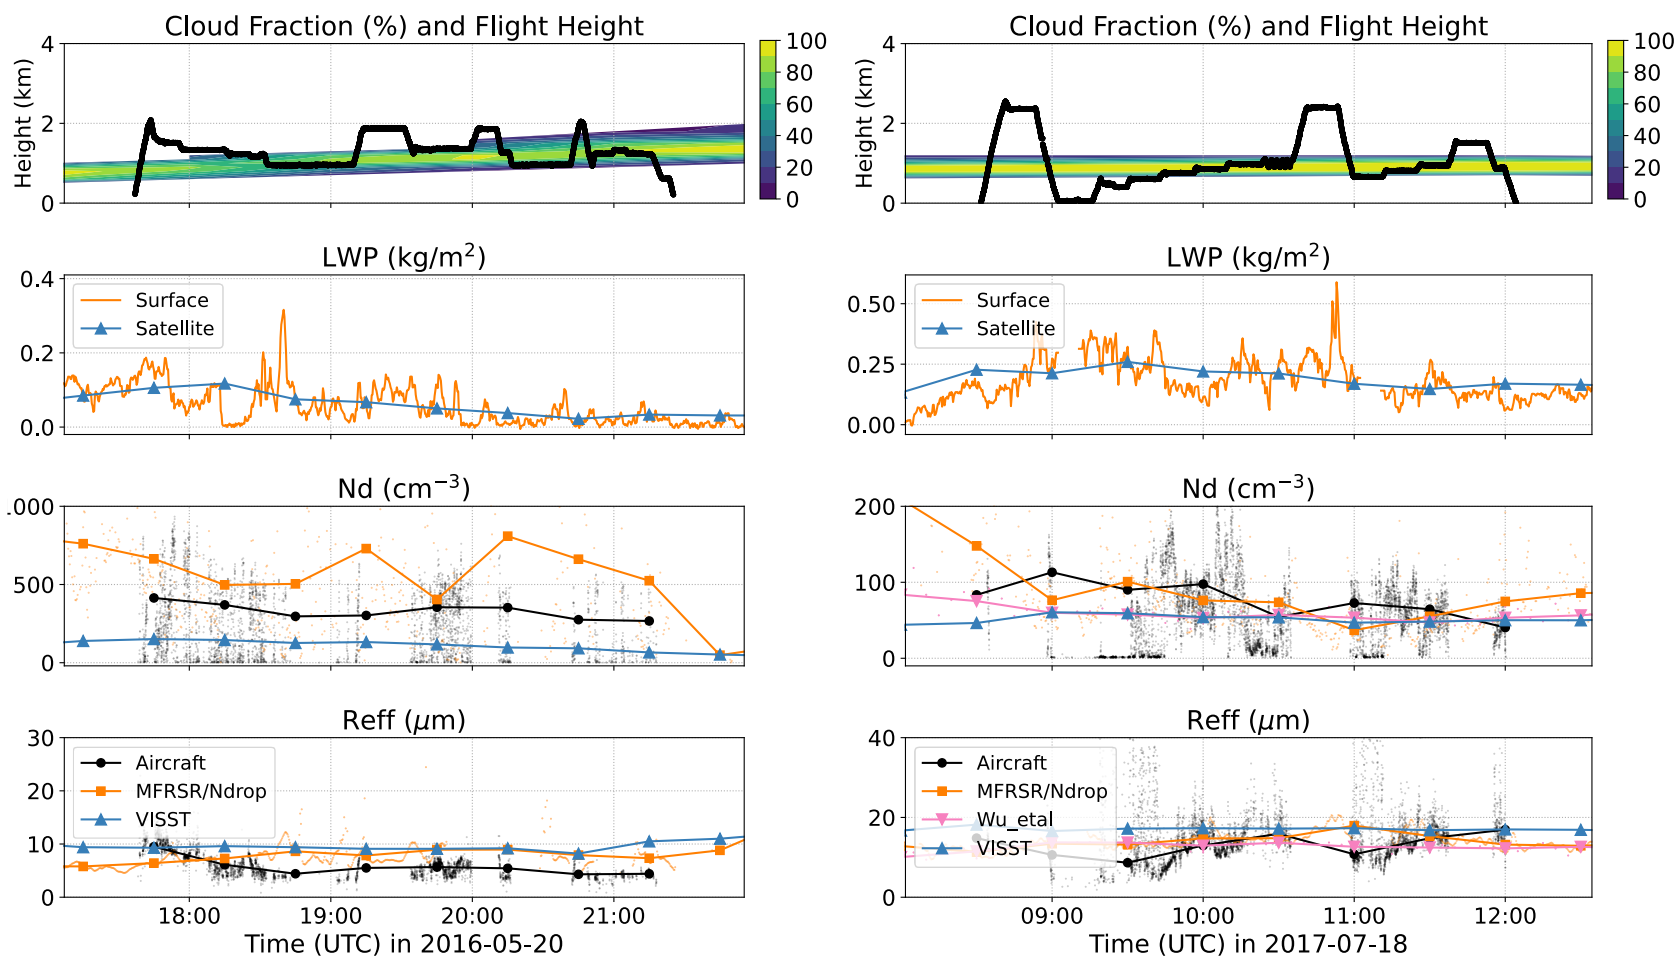

Figure S1: [from top to bottom]: Cloud fraction and aircraft height, LWP,  $N_d$ , and  $R_{eff}$  from different measurements for two cases: (left) 20 May 2016 in HI-SCALE and (right) 18 July 2018 in ACE-ENA. In  $N_d$  and  $R_{eff}$  plots, small dots are measurements/retrievals at native resolution, while solid lines with dots are values averaged into 30 minutes resolution. The orange line with square marker represents MFRSR data for  $R_{eff}$  and Ndrop data for  $N_d$ .

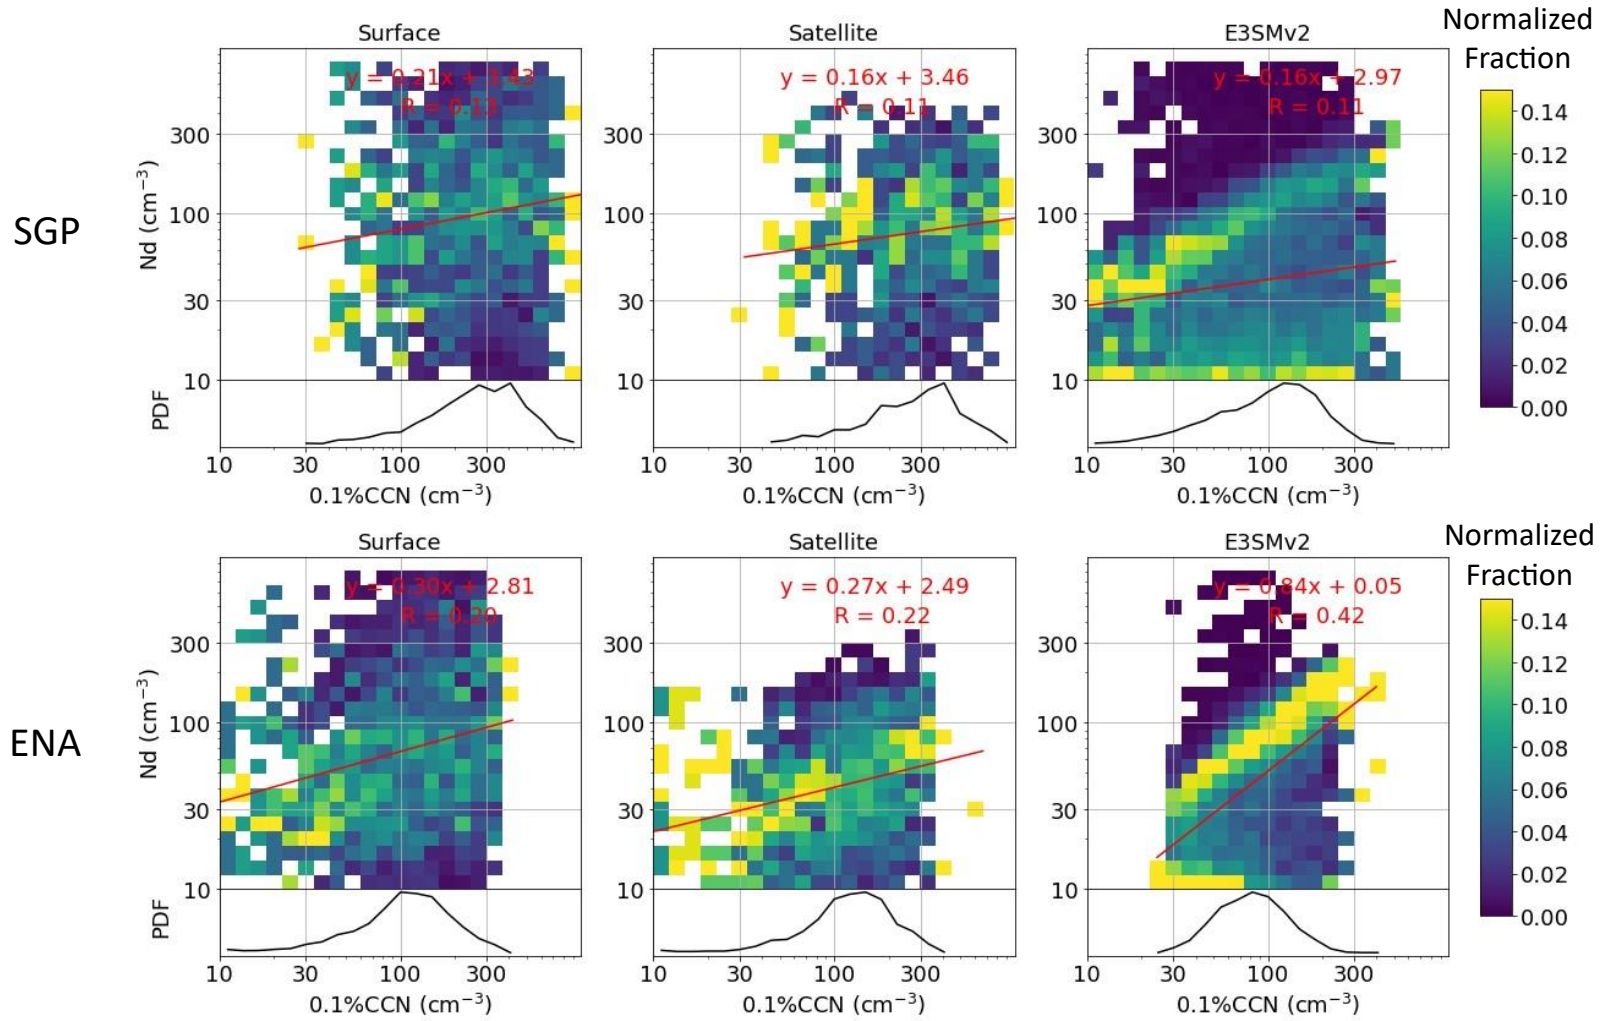

Figure S2: Joint histogram of Nd versus surface CCN concentration at 0.1% supersaturation, normalized by CCN concentration. For all available samples at (top) SGP from 2011-2020 and (bottom) ENA from 2016-2018. Linear fits and R values are shown in red.

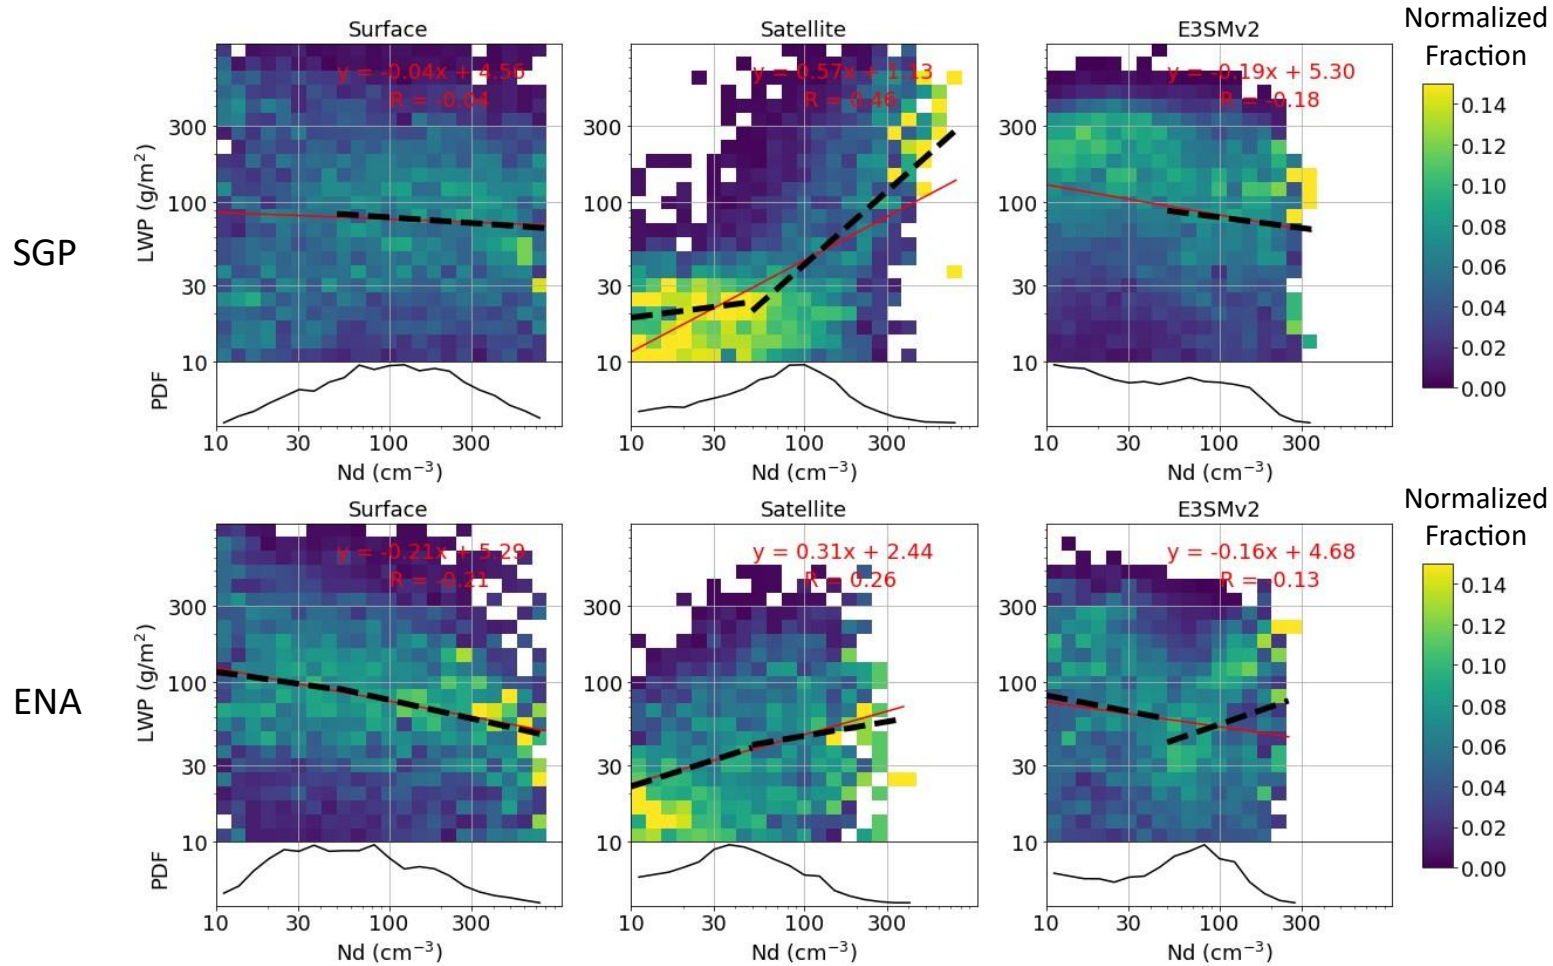

Figure S3: Joint histogram of LWP versus Nd, normalized by Nd concentration. For all available samples at (top) SGP from 2011-2020 and (bottom) ENA from 2016-2018. Red lines and equations are linear fits for all data samples and black dashed lines are linear fits for  $N_d < 50 \text{ cm}^{-3}$  and  $N_d > 50 \text{ cm}^{-3}$  when the fits are statistically significant ( $p < 0.01$ ).

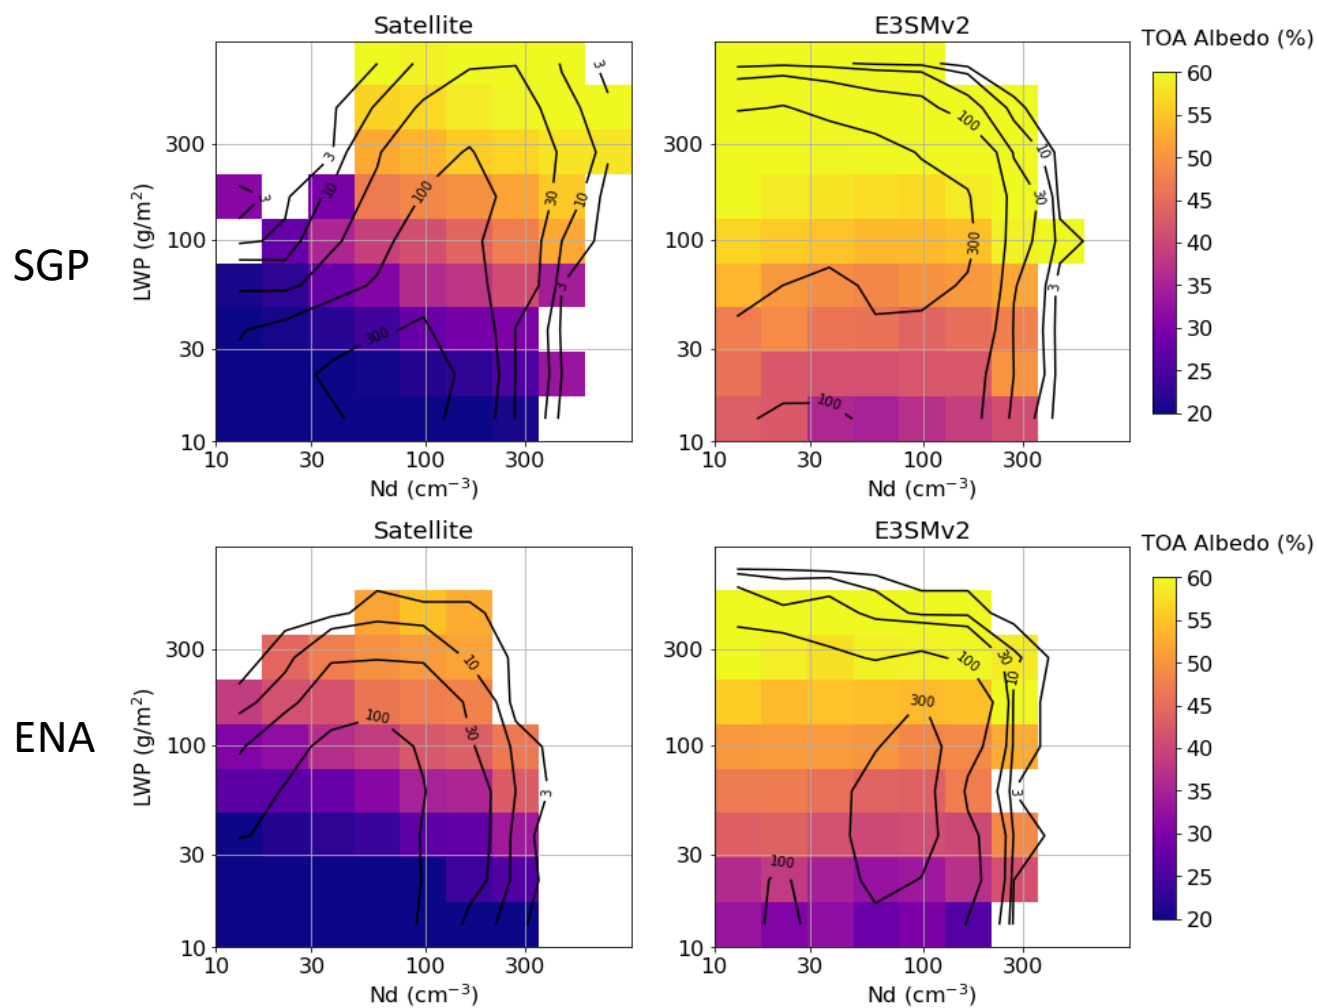

Figure S4: Heatmap of mean TOA albedo in LWP and Nd bins for all available samples at (top) SGP from 2011-2020 and (bottom) ENA from 2016-2018. Valid sample number is shown in black contour lines. Grids with valid sample number < 3 are not filled.

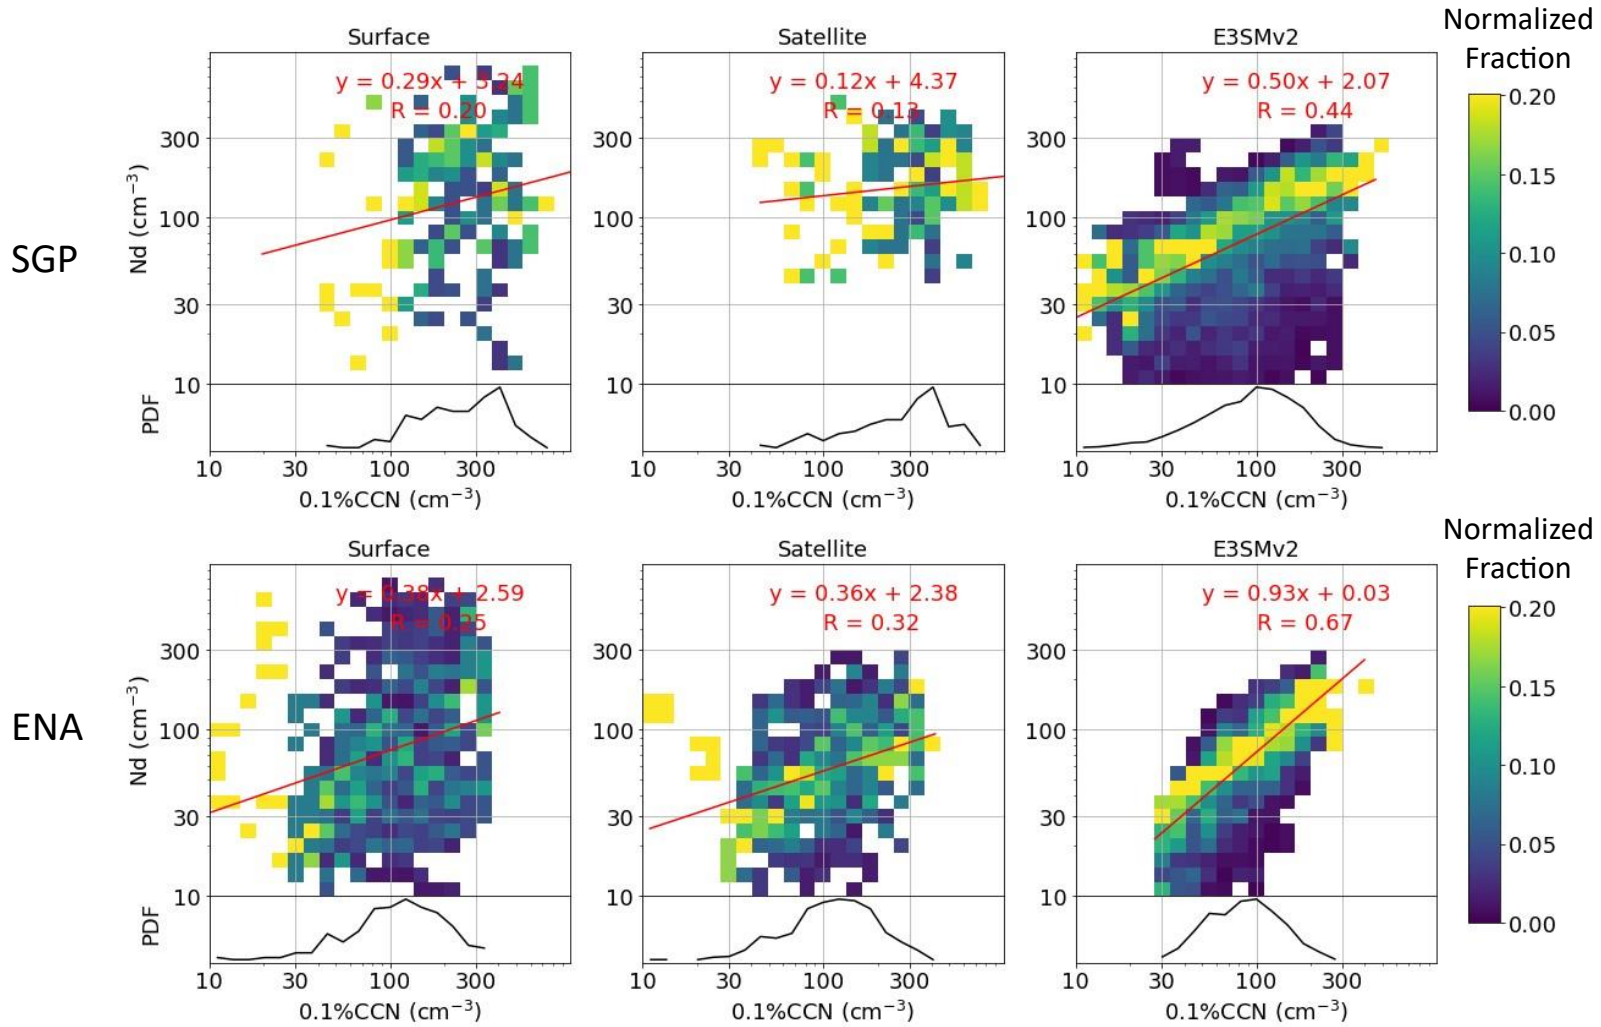

Figure S5: similar as Figure S2 but for samples of surface coupled overcast low-level liquid clouds (cloud top height < 4 km, cloud fraction > 90%, ice water path < 0.01 mm and potential temperature difference between cloud base and surface < 2K).



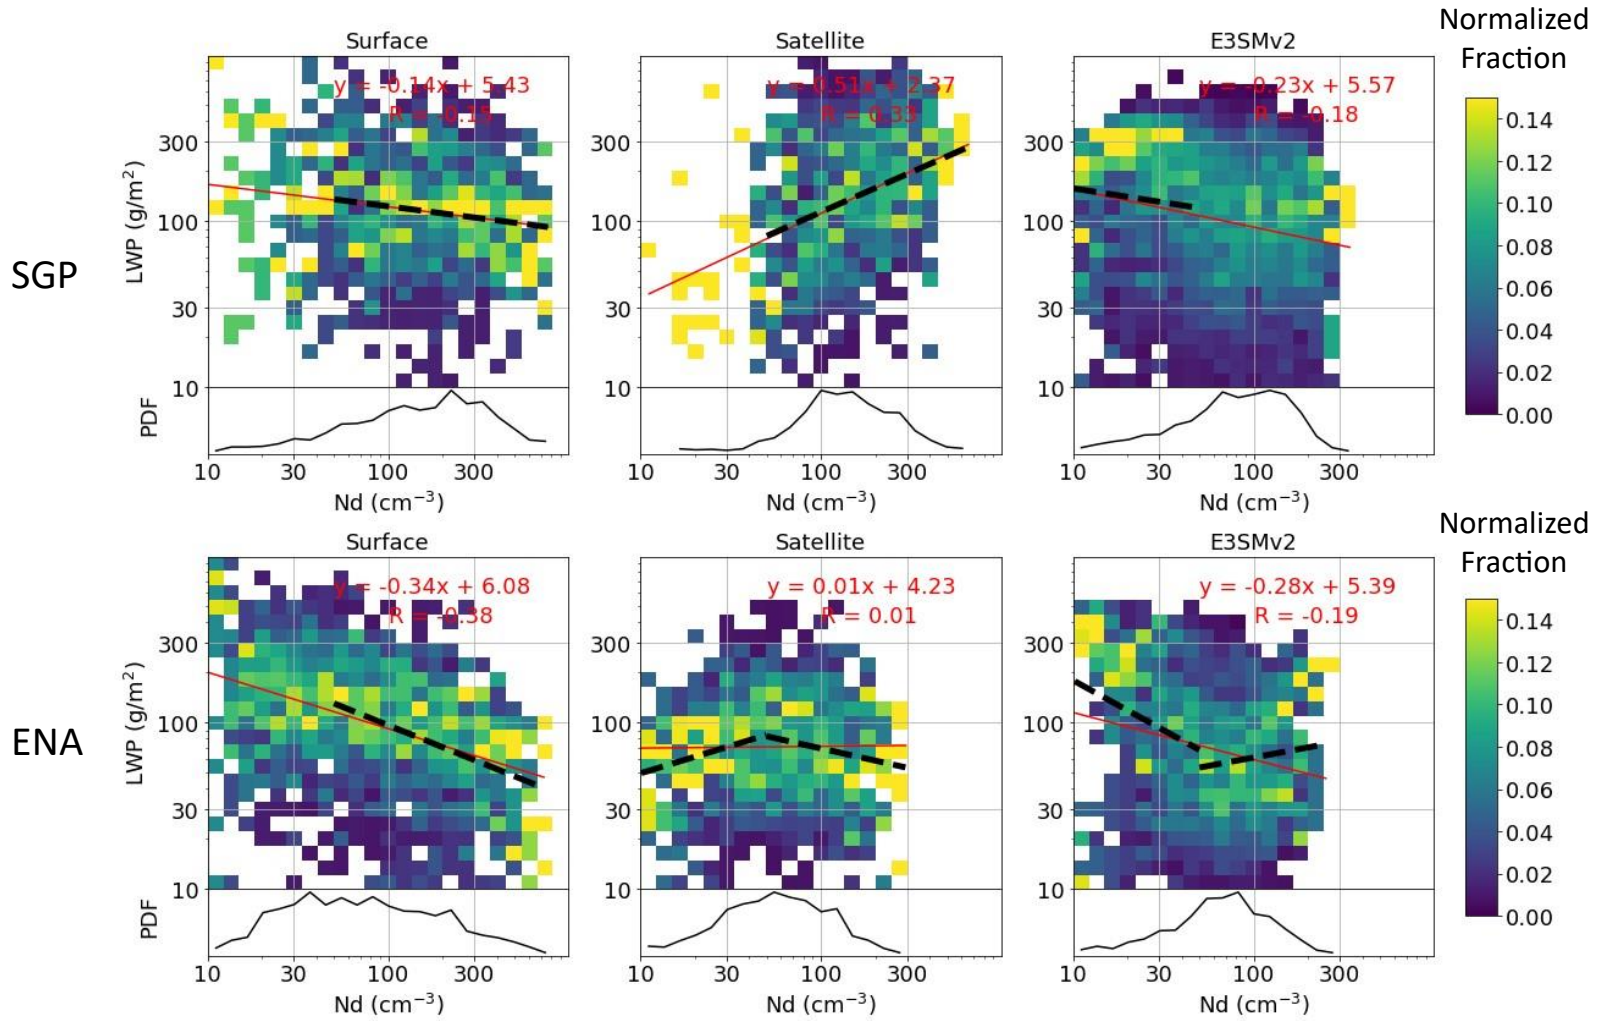

Figure S6: similar as Figure S3 but for samples of surface coupled overcast low-level liquid clouds (cloud top height < 4 km, cloud fraction > 90%, ice water path < 0.01 mm and potential temperature difference between cloud base and surface < 2K).

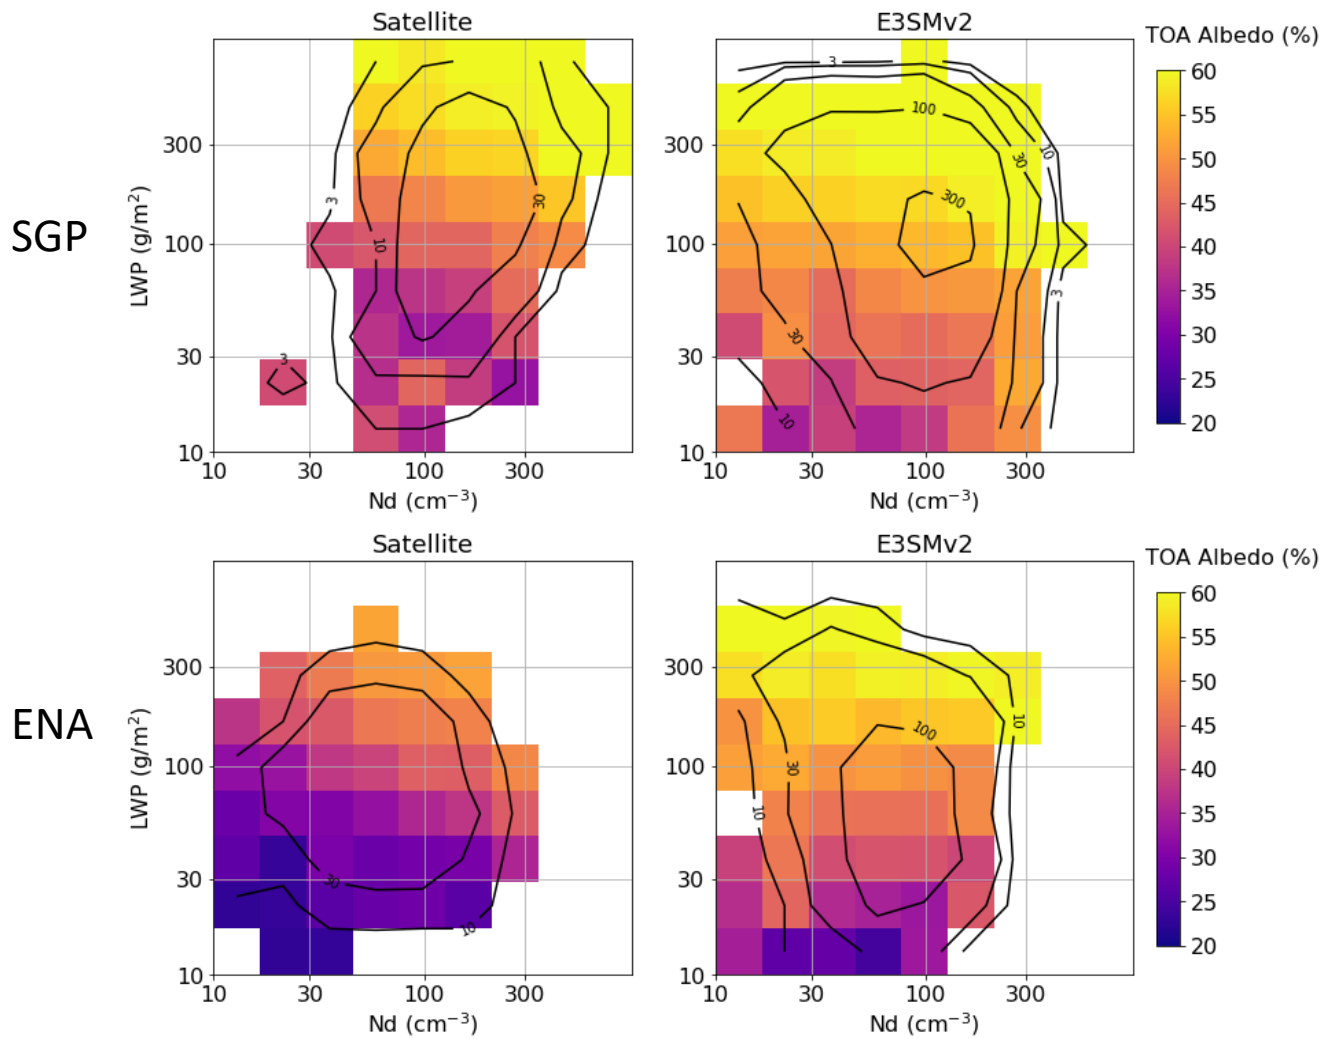

Figure S7: similar as Figure S4 but for samples of surface coupled overcast low-level liquid clouds (cloud top height < 4 km, cloud fraction > 90%, ice water path < 0.01 mm and potential temperature difference between cloud base and surface < 2K).
